# Supplementary material for: AECF-UC: An Adaptive Electricity Consumption Forecast Approach for Universal Environments
Source: Research Square preprint supplement (doi:10.21203/rs.3.rs-6249659/v1), 2025-03-27
Supplement: Supplementary file 1 [file 0395ec681ea4c9a1d4fbbab4.docx]

**Highlights：**

- Proposed for adaptive and accurate probabilistic forecasting of short-term electricity loads
- Effectively manages fluctuating features and reduces high-frequency noise to improve forecasting reliability
- Achieves superior accuracy, adaptability, and robustness, with significant reductions in pinball loss and variance under diverse conditions
